# Supplementary material
Source: Copernicus journal article supplement (doi:10.5194/nhess-26-1975-2026)
Supplement: Supplementary file 1 [file nhess-26-1975-2026-supplement.pdf]

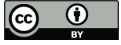

*Supplement of*

**Detection and characterization of precipitation extremes and  
geohydrological hazards over a transboundary Alpine area based on  
different methods and climate datasets**

Alice Crespi et al.

*Correspondence to:* Alice Crespi ([alice.crespi@eurac.edu](mailto:alice.crespi@eurac.edu))

The copyright of individual parts of the supplement might differ from the article licence.

|                                                    | SPARTACUS-TST                                                                                | INCA                                                                                                                                                                | CERRA-Land                                                                                                                                                                     | ERA5-Land                                                                                          |
|----------------------------------------------------|----------------------------------------------------------------------------------------------|---------------------------------------------------------------------------------------------------------------------------------------------------------------------|--------------------------------------------------------------------------------------------------------------------------------------------------------------------------------|----------------------------------------------------------------------------------------------------|
| Spatial resolution                                 | 1 km                                                                                         | 1 km                                                                                                                                                                | 5.5 km (0.05°)                                                                                                                                                                 | 9 km (0.1°)                                                                                        |
| Temporal resolution                                | daily                                                                                        | daily                                                                                                                                                               | daily                                                                                                                                                                          | hourly                                                                                             |
| Spatial domain                                     | Austria and South Tyrol                                                                      | Greater Alpine Region                                                                                                                                               | Europe                                                                                                                                                                         | Global                                                                                             |
| Temporal coverage<br>(at the time of the analysis) | 1980-present                                                                                 | 2003-present                                                                                                                                                        | 1984-2021                                                                                                                                                                      | 1950 - present                                                                                     |
| Data sources                                       | Interpolation of in situ station observations.                                               | Integration of in situ station observations, radar data, satellite products, topographic corrections and background fields from Numerical Weather Prediction model. | Land surface model driven by meteorological forcing data from CERRA reanalysis with an offline analysis of 24-h accumulated surface precipitation integrating rain gauge data. | Land component of ERA5 reanalysis forced by meteorological fields from ERA5; no data assimilation. |
| Strengths                                          | High observational accuracy; long-term temporal consistency; suitable for climate monitoring | Very high spatial and temporal resolution; strong representation of local-scale variability; good performance in complex terrain                                    | High spatial resolution; improved representation of European topography and land-surface heterogeneity; temporally and physically consistent reconstructions of land variables | Global product widely validated and used; long temporal coverage                                   |
| Limitations                                        | Limited spatial extent; underestimation of extremes; dependent on station density            | Limited spatial extent; not temporally homogeneous for climate trend analysis; methodology optimized for operational use                                            | No direct land data assimilation; limited representation of small-scale terrain effects                                                                                        | Coarser resolution than regional products; limited representation of small-scale terrain effects   |
| Main references                                    | Hiebl and Frei, 2018; Crespi et al., 2021                                                    | Haiden et al., 2009                                                                                                                                                 | Ridal et al., 2024; Verelle et al., 2022                                                                                                                                       | Muñoz-Sabater et al., 2021                                                                         |

**Table S1:** Key characteristics of precipitation fields of the meteorological datasets used in the study.

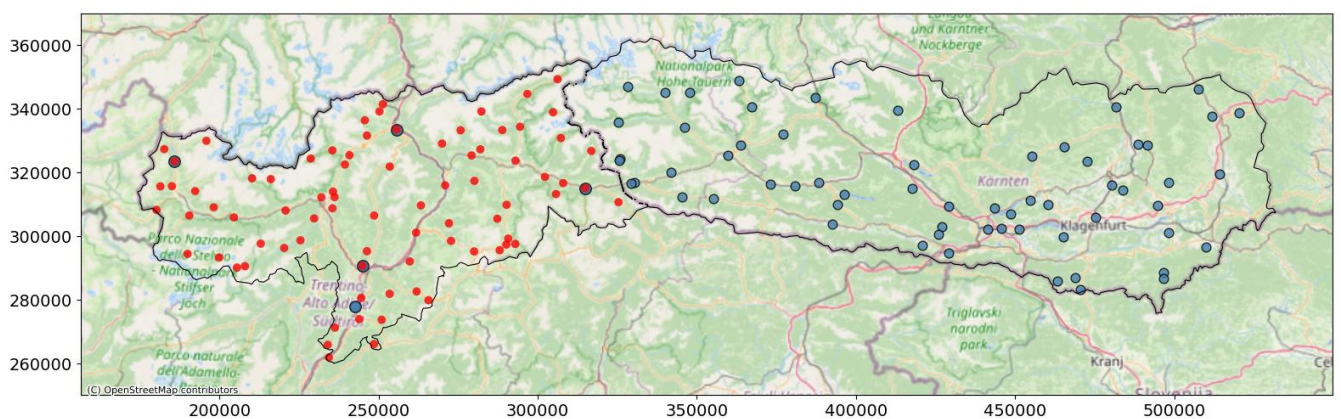

**Figure S1:** Map with station locations used in SPARTACUS (blue dots) and TST (red dots). Red points with blue borders are stations in common.

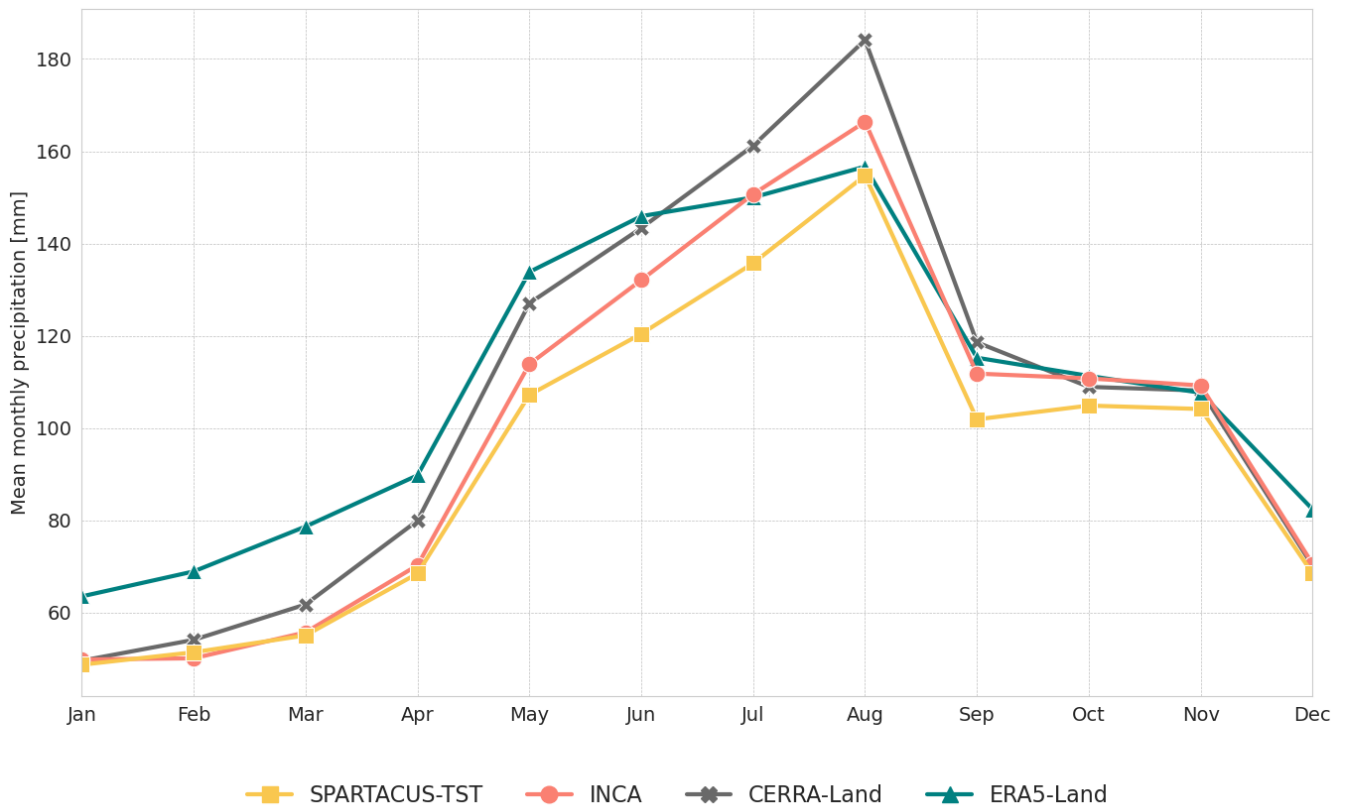

**Figure S2:** Mean monthly precipitation from 2003 to 2020 over the study region.

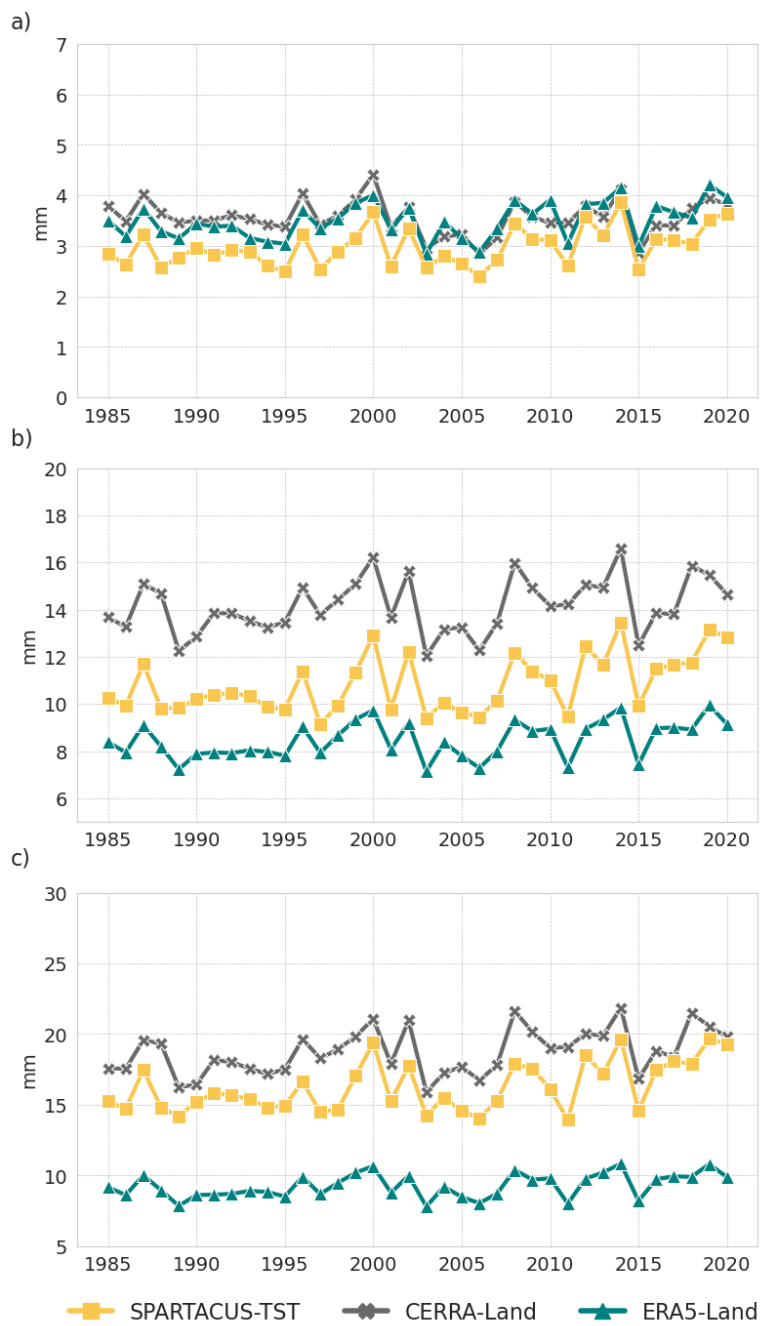

**Figure S3:** Annual time series 1985-2020 of the yearly averages of daily precipitation statistics: a) areal mean, b) local 99<sup>th</sup> percentile and c) local maximum over the study region based on SPARTACUS-TST, CERRA-Land and ERA5-Land.

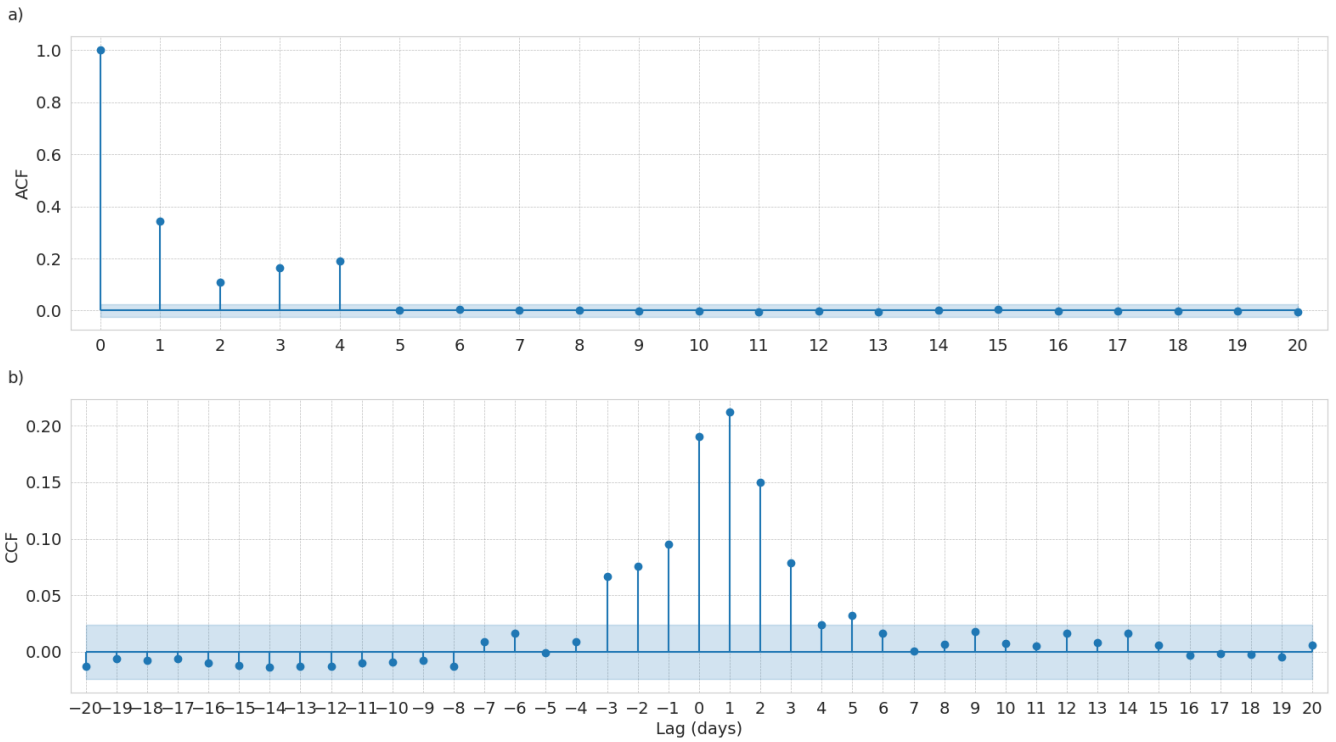

**Figure S4:** a) Autocorrelation of impact time series over 2003 to 2020; b) Cross-correlation of normalized and detrended time series of daily impact records and the local 99<sup>th</sup> percentile of daily precipitation fields from 2003 to 2020 based on SPARTACUS-TST. The shaded area represents the 0.05 significance threshold.

|               | areal mean     |      |            |           | local p99      |      |            |           | anomaly        |      |            |           |
|---------------|----------------|------|------------|-----------|----------------|------|------------|-----------|----------------|------|------------|-----------|
|               | SPARTAC US-TST | INCA | CERRA-Land | ERA5-Land | SPARTAC US-TST | INCA | CERRA-Land | ERA5-Land | SPARTAC US-TST | INCA | CERRA-Land | ERA5-Land |
| SPARTACUS-TST | -              | 87%  | 88%        | 84%       | -              | 81%  | 78%        | 80%       | -              | 81%  | 83%        | 75%       |
| INCA          | 87%            | -    | 82%        | 85%       | 82%            | -    | 73%        | 75%       | 81%            | -    | 73%        | 74%       |
| CERRA-Land    | 88%            | 81%  | -          | 78%       | 77%            | 73%  | -          | 71%       | 83%            | 73%  | -          | 72%       |
| ERA5-Land     | 84%            | 85%  | 78%        | -         | 81%            | 75%  | 71%        | -         | 75%            | 74%  | 72%        | -         |

**Table S2:** Portion of the 330 extreme events in common across datasets for each method. For each dataset in the left column, the number of event dates falling within any 5-day window of the events detected from every other dataset is counted.

|            | SPARTACUS-TST |           |         | INCA       |           |         | CERRA-LAND |           |         | ERA5-Land  |           |         |
|------------|---------------|-----------|---------|------------|-----------|---------|------------|-----------|---------|------------|-----------|---------|
|            | areal mean    | local p99 | anomaly | areal mean | local p99 | anomaly | areal mean | local p99 | anomaly | areal mean | local p99 | anomaly |
| areal mean | -             | 84%       | 79%     | -          | 79%       | 78%     | -          | 88%       | 80%     | -          | 83%       | 82%     |
| local p99  | 84%           | -         | 83%     | 79%        | -         | 81%     | 88%        | -         | 82%     | 82%        | -         | 81%     |
| anomaly    | 79%           | 83%       | -       | 78%        | 81%       | -       | 80%        | 82%       | -       | 82%        | 81%       | -       |

**Table S3:** Portion of the 330 extreme events in common across methods for each dataset. For each method in the left column, the number of event dates falling within any 5-day window of the events detected by every other method is counted.

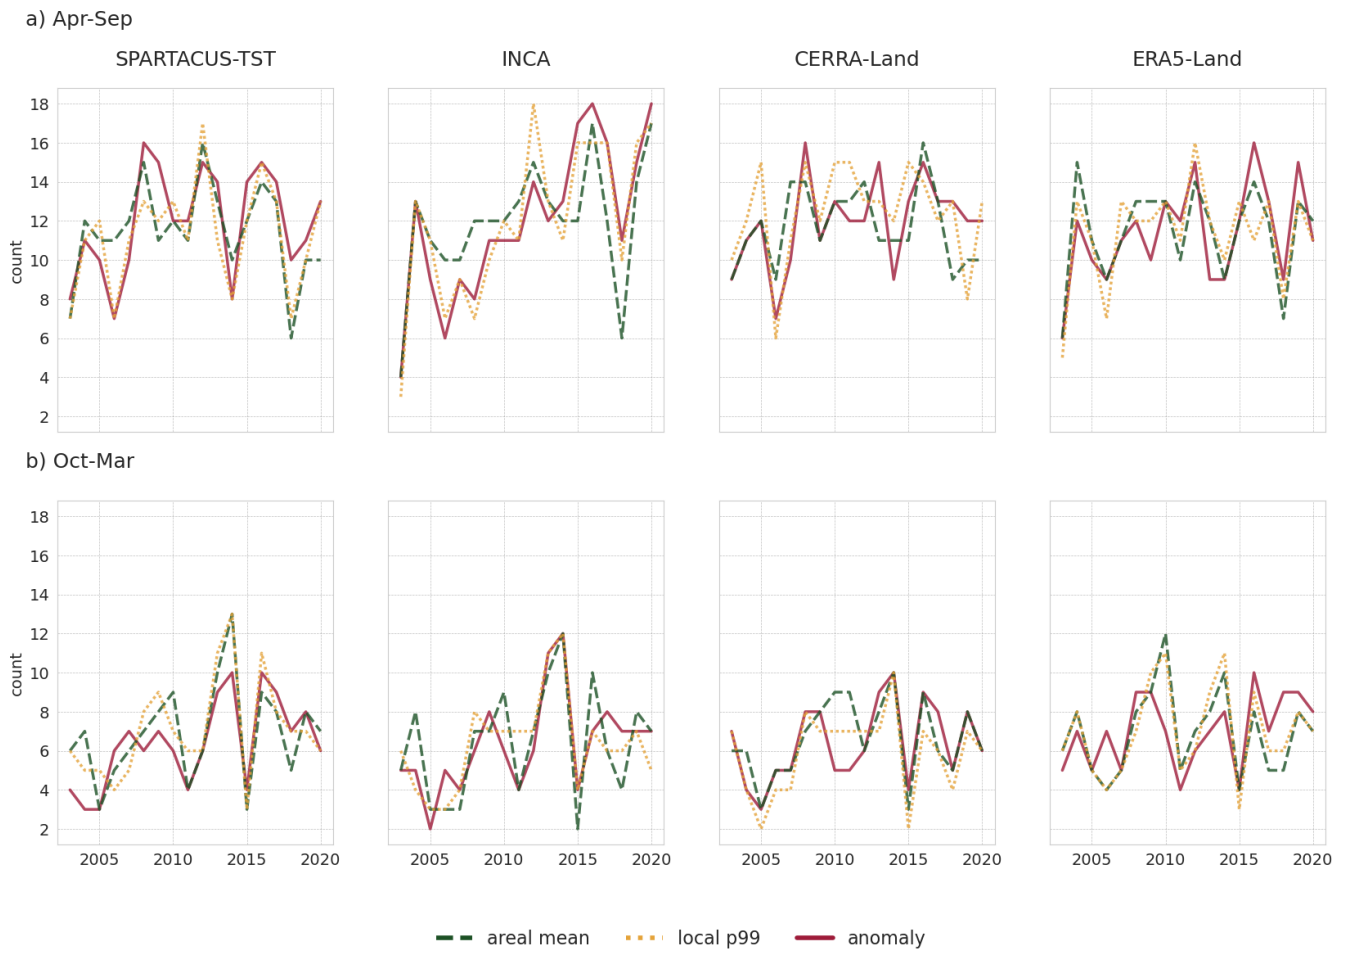

**Figure S5:** Event counts per year in a) summer half year (April to September) and b) winter half year (October to March) based on the top 5% most extreme precipitation days detected by different methods from 2003-2020 for SPARTACUS-TST, INCA, CERRA-Land and ERA5-Land.

|               | areal mean | local p99 | anomaly |
|---------------|------------|-----------|---------|
| SPARTACUS-TST | 0.23       | 0.21      | 0.22    |
| INCA          | 0.22       | 0.20      | 0.22    |
| CERRA-Land    | 0.21       | 0.17      | 0.22    |
| ERA5-Land     | 0.17       | 0.17      | 0.16    |

**Table S4:** Correlation coefficients of daily time series of impact records and different daily precipitation statistics used to detect extreme precipitation events over 2003-2020 for each dataset. The correlation is calculated for all years considering a lag of one day between precipitation statistics and impact counts.

| FLOODS        | Areal mean |        |        | Local p99 |        |        | Anomaly |        |        |
|---------------|------------|--------|--------|-----------|--------|--------|---------|--------|--------|
|               | Year       | Summer | Winter | Year      | Summer | Winter | Year    | Summer | Winter |
| SPARTACUS-TST | 48.7       | 44.6   | 60.5   | 58.0      | 58.0   | 57.9   | 58.0    | 57.1   | 60.5   |
| INCA          | 51.3       | 49.1   | 57.9   | 59.3      | 57.1   | 65.8   | 56.7    | 55.4   | 60.5   |
| CERRA-Land    | 48.7       | 43.8   | 63.2   | 56.0      | 54.5   | 60.5   | 49.3    | 44.6   | 63.2   |
| ERA5-Land     | 42.7       | 35.7   | 63.2   | 47.3      | 42.9   | 60.5   | 42.7    | 36.6   | 60.5   |

**Table S5:** Hit rate (%) as the portion of hazardous dates (i.e., dates with at least two flood records) occurring in coincidence of an extreme precipitation event (within a 5-day window centred on the extreme precipitation days) for each combination of datasets and methods and by considering the whole year, summer (April to September) and winter (October to March) half years. The top 5% most extreme precipitation dates over 2003-2020 are considered (330 events).

| MASS MOVEMENTS | Areal mean |        |        | Local p99 |        |        | Anomaly |        |        |
|----------------|------------|--------|--------|-----------|--------|--------|---------|--------|--------|
|                | Year       | Summer | Winter | Year      | Summer | Winter | Year    | Summer | Winter |
| SPARTACUS-TST  | 51.8       | 51.0   | 53.1   | 55.4      | 57.2   | 52.2   | 53.1    | 54.6   | 50.4   |
| INCA           | 54.1       | 53.6   | 54.9   | 55.4      | 56.7   | 53.1   | 53.4    | 55.7   | 49.6   |
| CERRA-Land     | 50.2       | 51.5   | 47.8   | 53.7      | 55.2   | 51.3   | 50.5    | 50.5   | 50.4   |
| ERA5-Land      | 48.2       | 44.3   | 54.9   | 50.5      | 49.5   | 52.2   | 45.9    | 42.3   | 52.2   |

**Table S6:** Hit rate (%) as the portion of hazardous dates (i.e., dates with at least two mass movement records) occurring in coincidence of an extreme precipitation event (within a 5-day window centred on the extreme precipitation days) for each combination of datasets and methods and by considering the whole year, summer (April to September) and winter (October to March) half years. The top 5 % most extreme precipitation dates over 2003-2020 are considered (330 events).

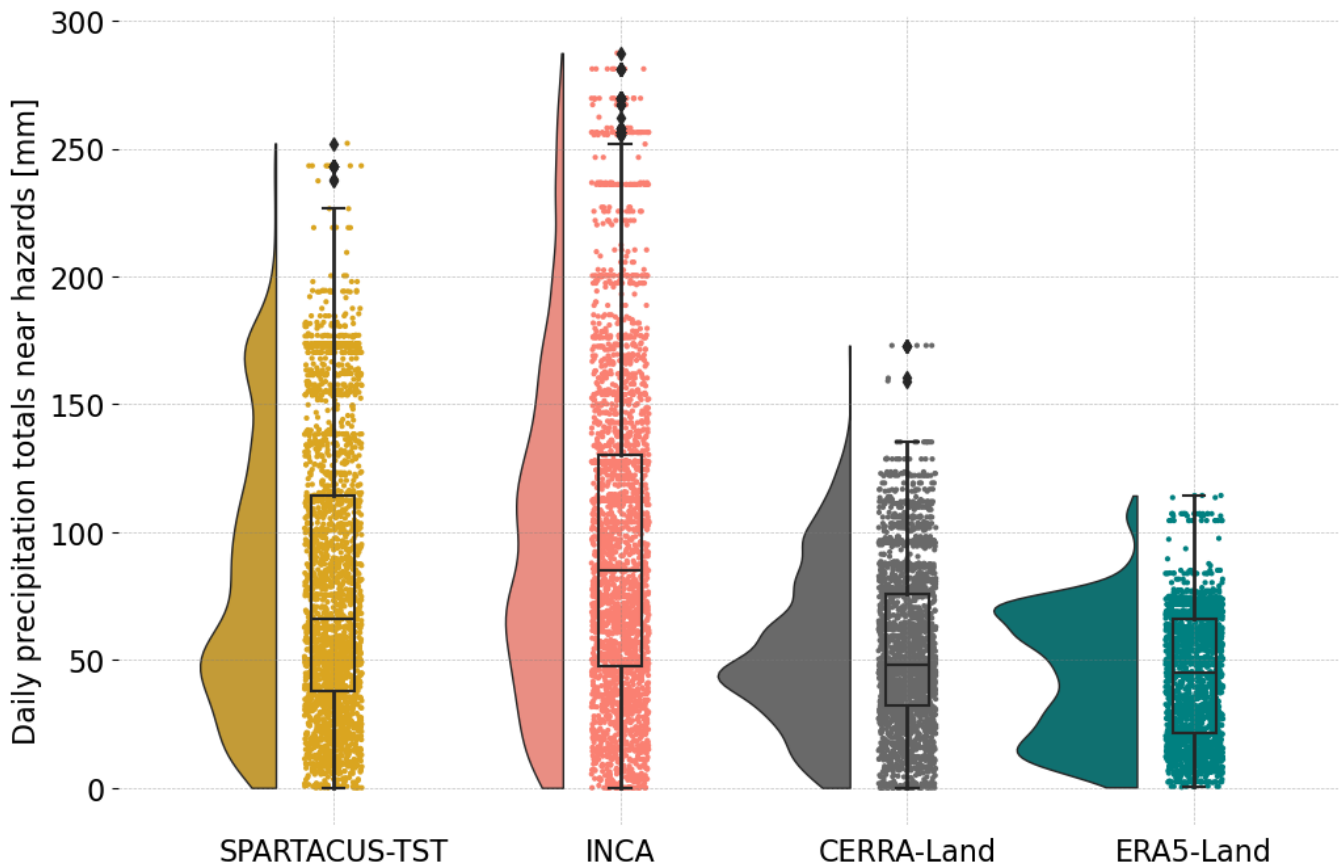

**Figure S6:** Distribution of 1-day precipitation intensities in the spatial proximity of recorded hazards for all datasets based on the most intense 5 % precipitation events (330 events) detected by the local p99 method. The precipitation intensities are extracted from the closest grid point to each hazard location without aggregating over co-occurring hazards.

| dataset           | method     | mean [mm] | median [mm] | 75 <sup>th</sup> percentile [mm] | max [mm] | absolute max [mm] |
|-------------------|------------|-----------|-------------|----------------------------------|----------|-------------------|
| SPARTACUS<br>-TST | local p99  | 46.0      | 41.5        | 60.2                             | 180.9    | 252.1             |
|                   | areal mean | 45.2      | 38.8        | 60.2                             | 180.9    | 252.1             |
|                   | anomaly    | 45.7      | 41.4        | 60.2                             | 180.9    | 252.1             |
| INCA              | local p99  | 53.4      | 45.8        | 74.2                             | 202.5    | 287.4             |
|                   | areal mean | 51.9      | 45.0        | 72.1                             | 202.5    | 287.4             |
|                   | anomaly    | 52.6      | 45.3        | 71.9                             | 202.5    | 287.4             |
| CERRA-Land        | local p99  | 37.7      | 36.5        | 48.5                             | 116.6    | 173.0             |
|                   | areal mean | 39.9      | 37.1        | 48.5                             | 142.4    | 173.0             |
|                   | anomaly    | 39.1      | 37.0        | 49.5                             | 142.4    | 173.0             |
| ERA5-Land         | local p99  | 25.8      | 22.2        | 32.5                             | 83.8     | 114.3             |
|                   | areal mean | 27.0      | 23.4        | 32.8                             | 83.5     | 98.8              |
|                   | anomaly    | 27.0      | 23.4        | 33.4                             | 83.5     | 98.8              |

**Table S7:** Summary statistics for median daily precipitation intensity in the proximity of hazard records (2003-2020) based on the 330 precipitation events detected by each dataset-method combination. Statistics is calculated over precipitation intensities extracted from the closest grid point to each impact location for which the median values over all hazard records on the same date are considered. In the last column the absolute maxima of local intensities without calculating the median are reported.

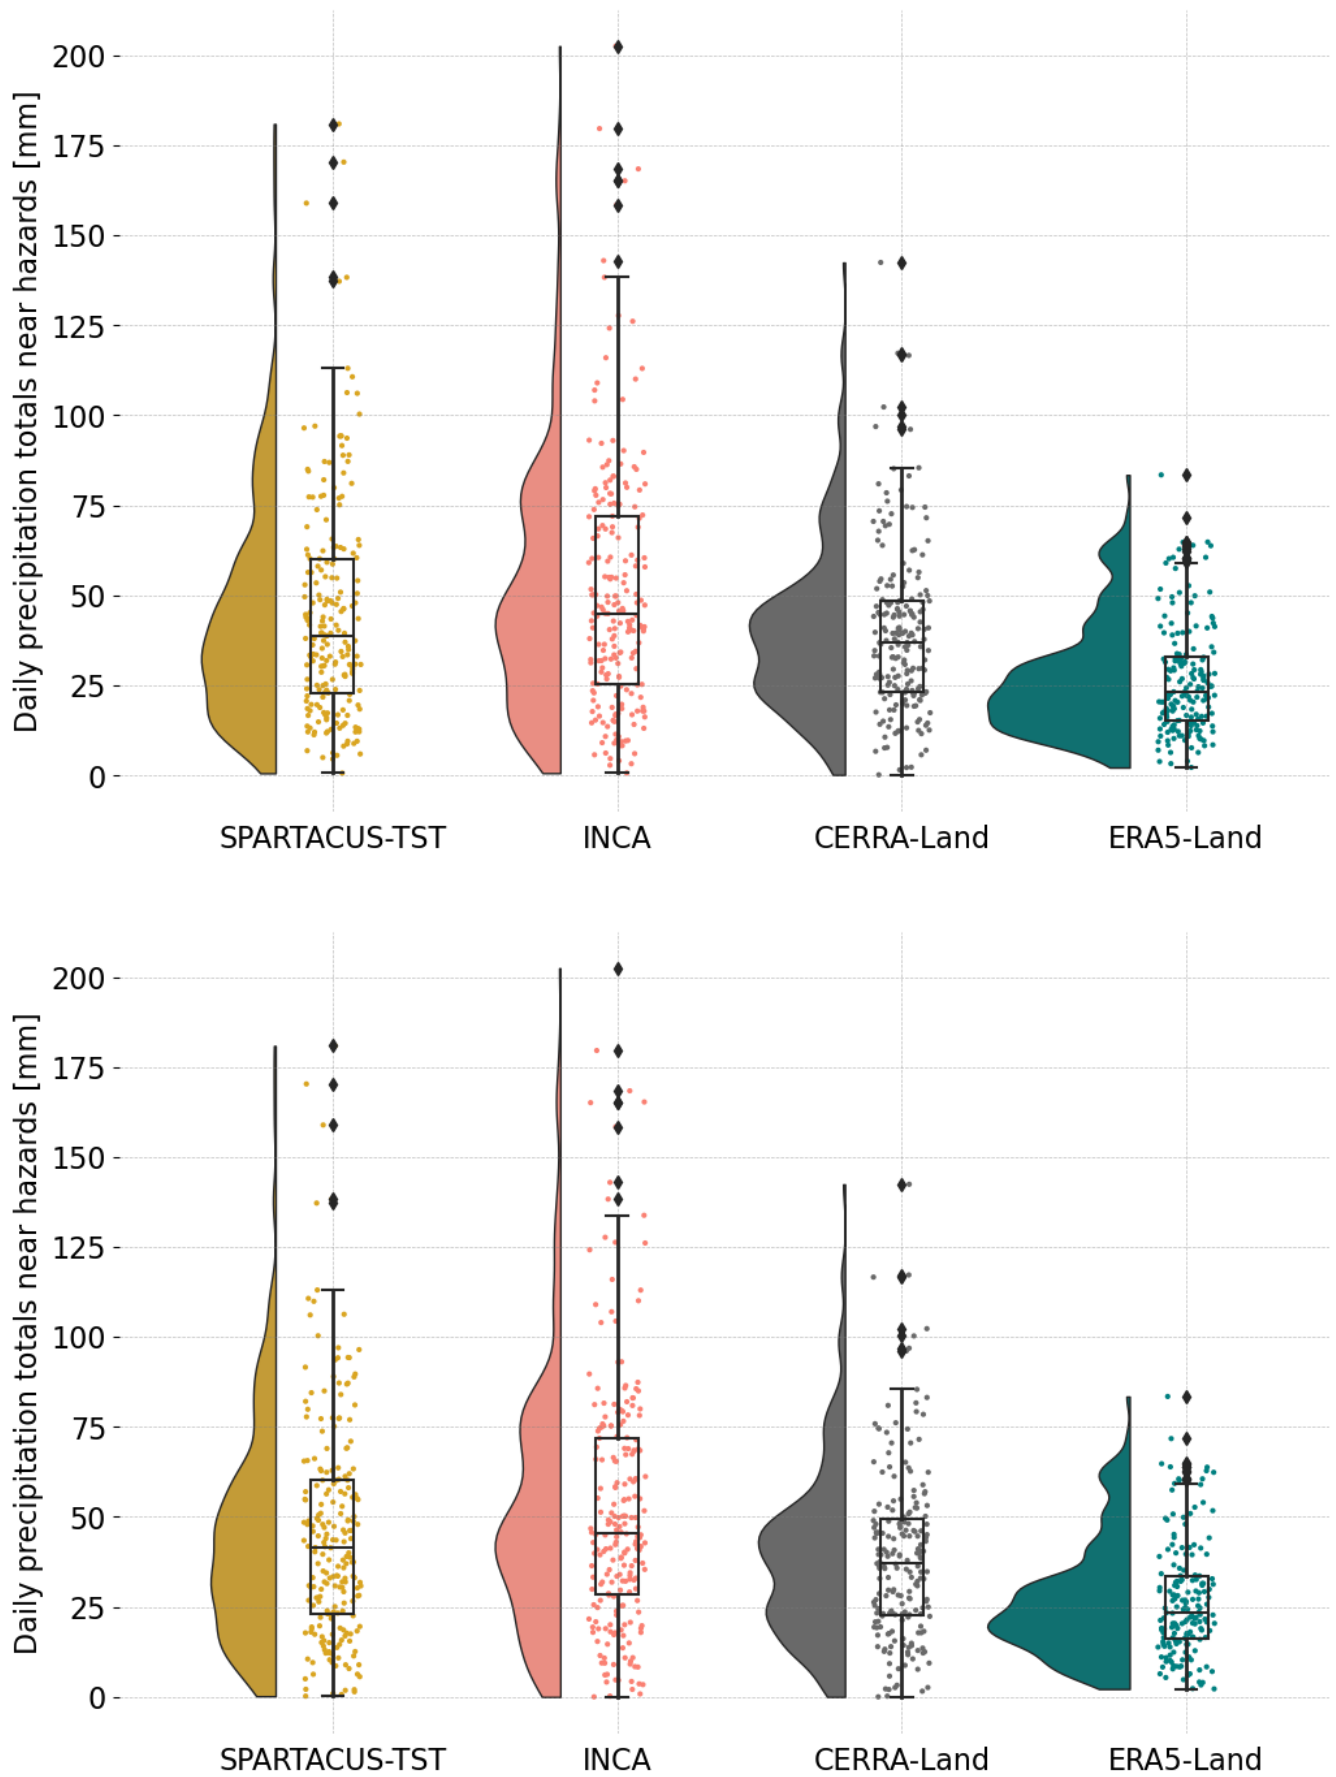

**Figure S7:** Distribution of 1-day precipitation intensities in the spatial proximity of recorded hazards for all datasets based on the most intense 5 % precipitation events (330 events) detected by the areal mean (upper panel) and the anomaly method (lower panel). The precipitation intensities are extracted from the closest grid point to each hazard location and the median values over all hazard records on the same date are displayed.

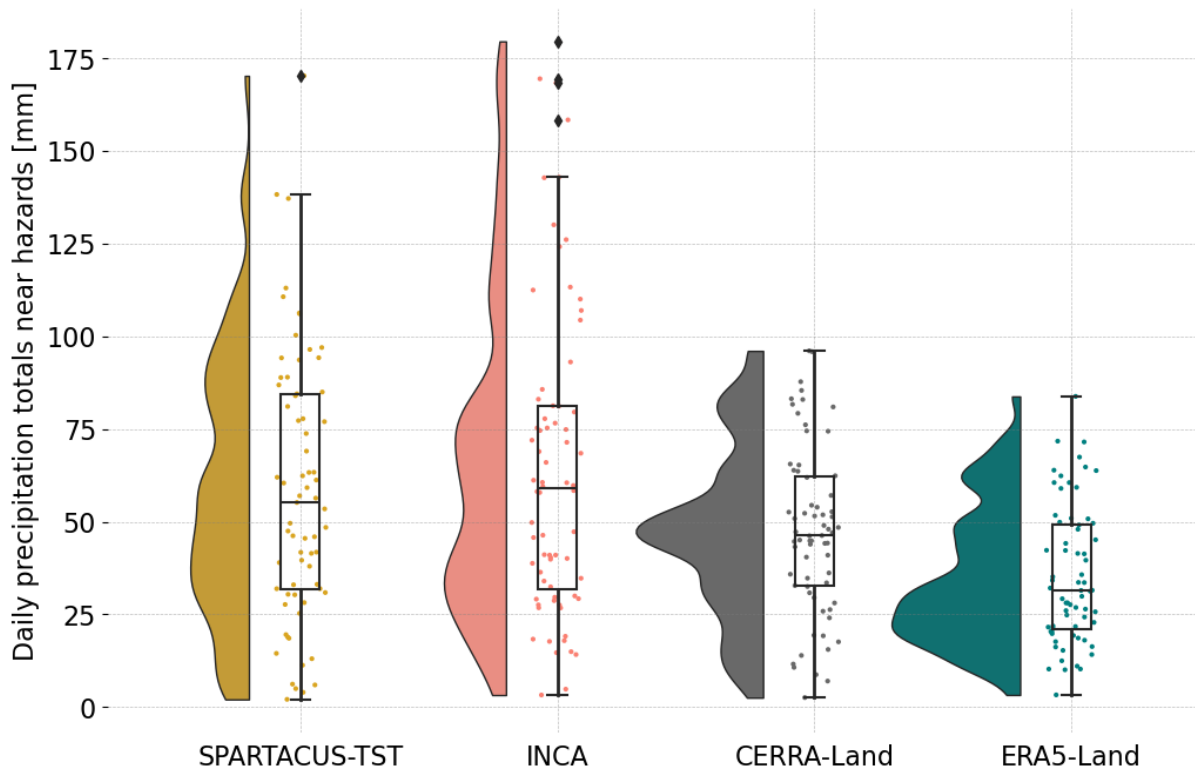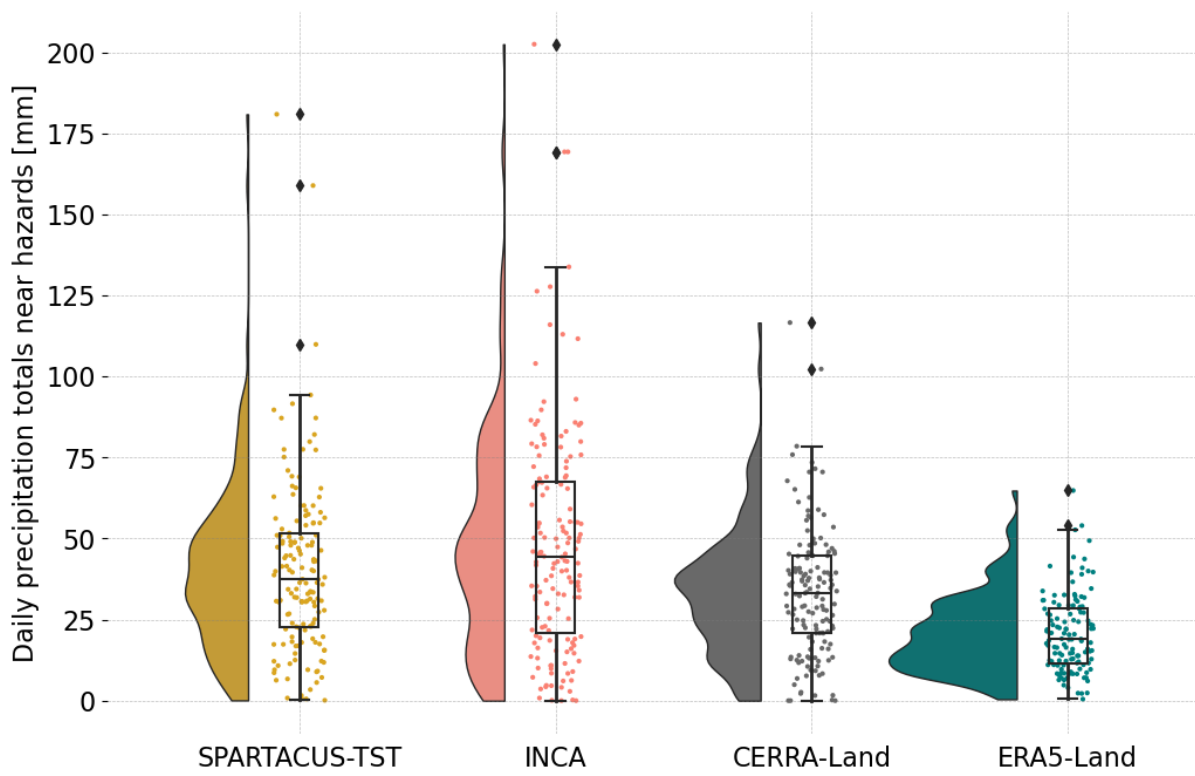

**Figure S8:** Distribution of precipitation intensities in the spatial proximity of recorded hazards for all datasets for the winter half year (October to March; upper panel) and the summer half year (April to September; lower panel) detected by the local p99 method. The precipitation intensities are extracted from the closest grid point to each hazard location and the median values over all hazard records on the same date are displayed.
